# Supplementary material for: Regulation ofSaccharomyces cerevisiae MEF1by Hda1p affects salt resistance ofbdf1Δmutant
Source: Oxford University Press journal article supplement (doi:10.1111/1567-1364.12144), 2014-02-13
Supplement: fyr12144-sup-0001-TableS1.docx [file fyr12144-sup-0001-TableS1.docx]

**TABLE S1. Gene-specific primers used in this study.**

| **Primers** | **Sequence ( 5′→3′)** | **Usage** |
| --- | --- | --- |
| L*HDA1*-1 | GAAATCTCGAGGAAAATGCT | Deletion of *HDA1*  Deletion of *HDA1*  Deletion of *HDA1*  Deletion of *HDA1*  Plasmid construction  Plasmid construction  Plasmid construction  Plasmid construction  Plasmid construction  Plasmid construction  RT—qPCR  RT—qPCR  RT—qPCR  RT—qPCR  RT—qPCR  RT—qPCR  RT—qPCR  RT—qPCR  RT—qPCR  RT—qPCR  CHIP  CHIP  CHIP  CHIP  CHIP  CHIP |
| L*HDA1*-2 | GTCATCACCGAAACGCGCGCTTAATCTGTTCGGCGTA |
| L*HDA1*-3 | AGAAAATACCGCATCAGGAAAGGAAAAACTGGCCATTAATAA |
| L*HDA1*-4 | GTAAGCATCCACTTTAATGTA |
| LpYX-*MEF1*-F | CCGGAATTCATGAGTGTCCAGAAAATGAT |
| LpYX-*MEF1*-R | ATCGAGCTCCTATTTCTTCGCTTGCTTCT |
| LYCp-*MEF1*-F | CTAGCTAGCATGAGTGTCCAGAAAATGAT |
| LYCp-*MEF1*-R | AAAACTGCAGCTATTTCTTCGCTTGCTTCT |
| LXM-*HDA1*-F | GAAGATCTATGGATTCTGTAATGGTTAAG |
| LXM-*HDA1*-R | GAAGATCTTCATTCTTCATCACTCCATTC |
| L qPCR-*MEF1*- F | ATGCTAATCAATGATGGTGCTA |
| L qPCR-*MEF1*- R | CTCTTAATGAGGTGGCGAAA |
| L qPCR-*HDA1*- F | CAGGTTATTGTTCCCGTTTG |
| L qPCR-*HDA1*- R | TCTTGGGTCCTCTGGATGTG |
| L qPCR-*ACT1*- F | ATGCAAACCGCTGCTCAA |
| L qPCR-*ACT1*- R | AGTTTGGTCAATACCGGCAGA |
| L qPCR-*ACO1*- F | GTTGACACCTTCTCCGCTAC |
| L qPCR-*ACO1*- R | TTACCACGACCAGTTGCTTC |
| L qPCR-*OYE2*- F | GGCTAACAACCCACAACACA |
| L qPCR-*OYE2*- R | GGATTTCAACACCATCGGCA |
| L chip-*MEF1*- F | CCCGGAATGAAGGAAAGAAA |
| L chip-*MEF1*- R | GAGGCACCCACATCATTTTC |
| L chip-*HDA1*- F | CTCGAGGAAAATGCTTCTTTC |
| L chip-*HDA1*- R | ATCCATGCTTAATCTGTTCGG |
| L chip-*ENA1*- F | GGTCTTTTCCTCTTATTCCG |
| L chip-*ENA1*- R | TCCTTAGTAGTTCCTTCGCC |
| L chip-*ACO1*- F | GAGAAATTAGTGCATACGAG | CHIP  CHIP  CHIP  CHIP  Construction of *HDA1+*Flag |
| L chip-*ACO1*- R | GCAGACAGCATTGTATATCT |
| L chip-*OYE2*- F | ATGCTTTTTCCGTCTCGTGT |
| L chip-*OYE2*- R | CTTGTGGCTTAAAGTCCTTA |
| L*HDA1+*Flag-up | TCGCAGCTGATGGATTCTGTAATGGTTAAG |
| L*HDA1+*Flag-down | ACGCGTCGACTCACTTGTCATCGTCGTCCTTGTAGTCTTCTTCATCACTCCATTCTTC | Construction of *HDA1+*Flag |
| L*HDA1*-intra | CAAACAATAGCCACCAATGC | Construction of *HDA1+*Flag |
| LKan-rec | GAAGGTTGCCGAAAAAAAATTATTAATGGCCAGTTTTTCCGCATAGGCCACTAGTGGAT | Amplification of  *HDA1+*Flag+loxp-Kan-loxp cassette |
| LKan-RE | AAGCCGTTTCTGTAATGAAG | Amplification of  *HDA1+*Flag+loxp-Kan-loxp cassette |
| *ATP1*-L1 | CTCATATATTCCCAAACAGG | Deletion of *ATP1* |
| *ATP1*-L2： | GTCATCACCGAAACGCGCTATTATATGTGCGTGTTTTTTTT | Deletion of *ATP1* |
| *ATP1*-L3： | AGAAAATACCGCATCAGGAAATGTGAACTAAAAAAATAAAAATGA | Deletion of *ATP1* |
| *ATP1*-L4 | GGGCATTATTTACCATAAGAA | Deletion of *ATP1* |
| *ATP1*-up | CGCGGATCCATGTTGGCTCGTACTGCT | Plasmid construction |
| *ATP1*-down | CCGCTCGAGTTAAAAAGTGGCAACAAATGAT | Plasmid construction |
| *ATP2*-L1 | TTCTTTATCTCTCCAGGACA | Deletion of *ATP2* |
| *ATP2*-L2 | GTCATCACCGAAACGCGCTCTTTTTTTTATTTTTGTTTTCTC | Deletion of *ATP2* |
| *ATP2*-L3 | AGAAAATACCGCATCAGGAAAAAGAAATAAAGCTTAAACCAAG | Deletion of *ATP2* |
| *ATP2*-L4 | ATTATAGTCAGTCTTATAGAATA | Deletion of *ATP2* |
| *ATP2*-up | CCGGAATTCATGGTTTTGCCAAGACTATAT | Plasmid construction |
| *ATP2*-down | CCGCTCGAGTTTCTTCTAGTTGGCTTCAG | Plasmid construction |
| *COR1*-L1 | GTCTTATTCGAGGAAAACAG | Deletion of *COR1* |
| *COR1*-L2 | GTCATCACCGAAACGCGCTTTTTTTGTTTATATATCTTGTG | Deletion of *COR1* |
| *COR1*-L3 | AGAAAATACCGCATCAGGAAAGATGTGTGATAATATATTTTCC | Deletion of *COR1* |
| *COR1*-L4 | ACTTTTGCAAGGAACAGTGA | Deletion of *COR1* |
| *COR1*-up | CGCGGATCCATGCTAAGAACAGTAACTTCA | Plasmid construction |
| *COR1*-down | CCGCTCGAGTTACCATCTCATCATGGACA | Plasmid construction |
| *ILV5*-L1 | TTAATCGTACAAGAATCTTGG | Deletion of *ILV5* |
| *ILV5*-L2 | GTCATCACCGAAACGCGCGTTTTATTTTTTACTTATATTGCT | Deletion of *ILV5* |
| *ILV5*-L3 | AGAAAATACCGCATCAGGAAAAGAGGAAAATAATATCAAGTGC | Deletion of *ILV5* |
| *ILV5*-L4 | ATATTTGAAGCTGCTTCAGAA | Deletion of *ILV5* |
| *ILV5*-up | CGCGGATCCATGTTGAGAACTCAAGCCG | Plasmid construction |
| *ILV5*-down | CCGCTCGAGTTATTGGTTTTCTGGTCTCAA | Plasmid construction |
| *PDB1*-L1 | GACTCTTGATATTATCTCTGT | Deletion of *PDB1* |
| *PDB1*-L2 | GTCATCACCGAAACGCGCGTTGAACAAAATTATTGCAAAAG | Deletion of *PDB1* |
| *PDB1*-L3 | AGAAAATACCGCATCAGGAAAATAAACTTCAATCCAATAGGAA | Deletion of *PDB1* |
| *PDB1*-L4 | GTGTATTTGCAGTTATATATCT | Deletion of *PDB1* |
| *PDB1*-up | CGCGGATCCATGTTTTCCAGACTGCCAA | Plasmid construction |
| *PDB1*-down | CCGCTCGAGTTATTCAATTGACAAGACTTCTT | Plasmid construction |
| *POR1*-L1 | AATCAAACACCGCCATTTC | Deletion of *POR1* |
| *POR1*-L2 | GTCATCACCGAAACGCGCTGTTGAGAGGTTGGTTTGAT | Deletion of *POR1* |
| *POR1*-L3 | AGAAAATACCGCATCAGGAAAACGTATATATCTAATATATATATG | Deletion of *POR1* |
| *POR1*-L4 | AGTCAGGAAGTGAGTCTATT | Deletion of *POR1* |
| *POR1*-up | CGCGGATCCATGTCTCCTCCAGTTTACA | Plasmid construction |
| *POR1*-down | CCGCTCGAGTCAAGCGTCGAAGGACAAAT | Plasmid construction |
